# Supplementary material
Source: publisher figshare collection journal article supplement (https://gsajournals.figshare.com/ndownloader/files/12853538)
Supplement: Supplementary file 1 [file 12853538]

## Sheet: WH gene ontology
	WH-down biological process. Test type bionomial with Bonferroni correction. Sorted by hierarchical clustering. Yellow represents cluster headings.							WH-up biological process. Test type bionomial with Bonferroni correction. Sorted by hierarchical clustering. Yellow represents cluster headings.
	Bioloical process GO Term	# of genes in drosophila	# of genes in list	Expected	Fold Enrichment	P-value		Bioloical process GO Term	# of genes in drosophila	# of genes in list	Expected	Fold Enrichment	P-value
Cluster 1	establishment of imaginal disc-derived wing hair orientation	25	5	0.27	18.72	0.0283	Cluster 1	cellular response to light stimulus	42	7	0.55	12.67	0.00579
	post-embryonic animal morphogenesis	453	25	4.84	5.16	6.5e-08		response to light stimulus	146	14	1.92	7.29	4.04e-05
	post-embryonic development	612	28	6.54	4.28	2.61e-07		response to radiation	185	14	2.43	5.75	0.000713
	multicellular organism development	2311	52	24.69	2.11	0.000143		response to abiotic stimulus	438	19	5.76	3.3	0.0208
	multicellular organismal process	3591	63	38.37	1.64	0.0262		response to stimulus	2637	62	34.69	1.79	0.00409
	anatomical structure development	2676	60	28.59	2.1	7.22e-06	Cluster 2	phototransduction	55	9	0.72	12.44	0.000219
	developmental process	2767	62	29.57	2.1	3.26e-06		detection of light stimulus	62	9	0.82	11.03	0.000595
	anatomical structure morphogenesis	1494	42	15.96	2.63	9.76e-06		detection of abiotic stimulus	88	10	1.16	8.64	0.00114
	imaginal disc-derived wing hair organization	47	6	0.5	11.95	0.0441		detection of external stimulus	88	10	1.16	8.64	0.00114
	imaginal disc-derived wing morphogenesis	272	18	2.91	6.19	3.37e-06		response to external stimulus	888	41	11.68	3.51	4.88e-09
	post-embryonic appendage morphogenesis	319	19	3.41	5.57	6.21e-06	Cluster 3	humoral immune response	79	8	1.04	7.7	0.0397
	appendage morphogenesis	331	19	3.54	5.37	1.13e-05	Cluster 3	response to other organism	336	16	4.42	3.62	0.0378
	appendage development	340	19	3.63	5.23	1.73e-05		response to external biotic stimulus	336	16	4.42	3.62	0.0378
	wing disc morphogenesis	280	18	2.99	6.02	5.29e-06		response to biotic stimulus	336	16	4.42	3.62	0.0378
	imaginal disc morphogenesis	389	21	4.16	5.05	4.6e-06	Cluster 5	taxis	338	16	4.45	3.6	0.0407
	post-embryonic animal organ morphogenesis	389	21	4.16	5.05	4.6e-06
	post-embryonic animal organ development	452	22	4.83	4.56	1.18e-05
	animal organ development	1175	40	12.56	3.19	9.75e-08
	system development	1686	44	18.02	2.44	3.47e-05
	animal organ morphogenesis	721	31	7.7	4.02	9.96e-08
	metamorphosis	466	25	4.98	5.02	1.18e-07
	imaginal disc development	548	23	5.86	3.93	7.72e-05
	epithelium development	963	33	10.29	3.21	6.82e-06
	tissue development	1045	38	11.17	3.4	5.18e-08
	tube development	698	25	7.46	3.35	0.000372
	epithelial tube morphogenesis	463	23	4.95	4.65	3.4e-06
	tube morphogenesis	498	23	5.32	4.32	1.33e-05
	morphogenesis of an epithelium	589	25	6.29	3.97	1.4e-05
	tissue morphogenesis	606	25	6.48	3.86	2.45e-05
	instar larval or pupal morphogenesis	439	25	4.69	5.33	3.35e-08
	instar larval or pupal development	545	27	5.82	4.64	1.04e-07
	wing disc development	378	19	4.04	4.7	9.2e-05
	imaginal disc-derived appendage morphogenesis	328	19	3.5	5.42	9.72e-06
	imaginal disc-derived appendage development	335	19	3.58	5.31	1.36e-05
	non-sensory hair organization	48	6	0.51	11.7	0.0496
	hair cell differentiation	48	6	0.51	11.7	0.0496
	cell differentiation	1683	39	17.98	2.17	0.00662
	cellular developmental process	1724	41	18.42	2.23	0.00166
Cluster 2	actin filament organization	111	10	1.19	8.43	0.00135
	supramolecular fiber organization	187	14	2	7.01	5.98e-05
	actin cytoskeleton organization	235	16	2.51	6.37	2.05e-05
	cytoskeleton organization	560	28	5.98	4.68	3.41e-08
	actin filament-based process	256	16	2.74	5.85	6.67e-05
Cluster 3	muscle organ development	89	8	0.95	8.41	0.0204
	muscle structure development	218	12	2.33	5.15	0.0154
Cluster 4	epithelial cell migration	162	10	1.73	5.78	0.0373
	epithelium migration	163	10	1.74	5.74	0.0393
	cell migration	288	15	3.08	4.87	0.00189
	cell motility	333	15	3.56	4.22	0.0111
	localization of cell	338	15	3.61	4.15	0.0132
Cluster 5	respiratory system development	243	12	2.6	4.62	0.0453
Cluster 6	regulation of multicellular organismal process	712	25	7.61	3.29	0.00054
	regulation of biological process	3770	73	40.28	1.81	2.87e-05
	biological regulation	4218	76	45.07	1.69	0.000292
Cluster 7	regulation of cellular component organization	772	24	8.25	2.91	0.00834
	regulation of cellular process	3481	62	37.2	1.67	0.0197
Cluster 8	cell development	1331	34	14.22	2.39	0.00434
Cluster 9	negative regulation of biological process	1343	32	14.35	2.23	0.0404

## Sheet: MB gene ontology
	MB-down biological process. Test type bionomial with Bonferroni correction. Sorted by hierarchical clustering. Yellow represents cluster headings.							MB-up biological process. Test type bionomial with Bonferroni correction. Sorted by hierarchical clustering. Yellow represents cluster headings.
	Bioloical process GO Term	# of genes in drosophila	# of genes in list	Expected	Fold Enrichment	P-value		Bioloical process GO Term	# of genes in drosophila	# of genes in list	Expected	Fold Enrichment	P-value
Cluster 1	triglyceride metabolic process	23	5	0.23	21.99	0.013	Cluster 1	calcium ion-regulated exocytosis of neurotransmitter	9	4	0.12	34.54	0.0219
	acylglycerol metabolic process	27	5	0.27	18.73	0.0281		synaptic vesicle exocytosis	63	9	0.81	11.1	0.000562
	neutral lipid metabolic process	27	5	0.27	18.73	0.0281		neurotransmitter secretion	91	12	1.17	10.25	1.15e-05
	metabolic process	4750	73	46.96	1.55	0.0122		localization	2129	54	27.39	1.97	0.00126
	cellular metabolic process	3835	62	37.91	1.64	0.0265		neurotransmitter transport	129	13	1.66	7.83	5.89e-05
Cluster 2	tricarboxylic acid metabolic process	45	6	0.44	13.49	0.0222		presynaptic process involved in chemical synaptic transmission	93	12	1.2	10.03	1.45e-05
	carboxylic acid metabolic process	390	16	3.86	4.15	0.006		chemical synaptic transmission	220	22	2.83	7.77	6.09e-10
	oxoacid metabolic process	405	16	4	4	0.00969		anterograde trans-synaptic signaling	220	22	2.83	7.77	6.09e-10
	organic acid metabolic process	407	16	4.02	3.98	0.0103		trans-synaptic signaling	222	22	2.86	7.7	7.27e-10
	small molecule metabolic process	826	25	8.17	3.06	0.00182		synaptic signaling	223	22	2.87	7.67	7.94e-10
Cluster 3	antibiotic metabolic process	65	7	0.64	10.89	0.0149		cell-cell signaling	348	25	4.48	5.58	1.63e-08
Cluster 4	monocarboxylic acid biosynthetic process	94	8	0.93	8.61	0.0171		cell communication	1358	51	17.47	2.92	4.54e-09
	monocarboxylic acid metabolic process	172	10	1.7	5.88	0.0314		cellular process	6613	127	85.08	1.49	4.6e-07
Cluster 5	generation of precursor metabolites and energy	194	12	1.92	6.26	0.00207		signaling	1295	51	16.66	3.06	7.5e-10
Cluster 6	cofactor metabolic process	240	13	2.37	5.48	0.00302		signal release from synapse	91	12	1.17	10.25	1.15e-05
Cluster 7	oxidation-reduction process	577	27	5.7	4.73	5.64e-08		signal release	101	12	1.3	9.23	3.58e-05
								secretion by cell	176	14	2.26	6.18	0.000298
								secretion	196	14	2.52	5.55	0.00108
								regulation of neurotransmitter levels	141	15	1.81	8.27	2.2e-06
								regulation of biological quality	1297	51	16.69	3.06	7.95e-10
								biological regulation	4218	128	54.27	2.36	1.84e-26
								synaptic vesicle transport	82	10	1.06	9.48	0.000488
								synaptic vesicle localization	85	10	1.09	9.14	0.000676
								vesicle localization	97	10	1.25	8.01	0.00222
								organelle localization	246	15	3.17	4.74	0.0029
								vesicle-mediated transport in synapse	110	10	1.42	7.07	0.00677
								establishment of synaptic vesicle localization	82	10	1.06	9.48	0.000488
								establishment of vesicle localization	93	10	1.2	8.36	0.00152
								establishment of organelle localization	193	13	2.48	5.24	0.00546
								synaptic vesicle cycle	113	10	1.45	6.88	0.00857
								calcium ion regulated exocytosis	63	9	0.81	11.1	0.000562
								regulated exocytosis	65	9	0.84	10.76	0.000729
								exocytosis	101	12	1.3	9.23	3.58e-05
							Cluster 2	synaptic transmission, cholinergic	10	4	0.13	31.09	0.0331
							Cluster 3	regulation of calcium ion-dependent exocytosis	16	5	0.21	24.29	0.00817
								regulation of regulated secretory pathway	16	5	0.21	24.29	0.00817
								regulation of exocytosis	34	6	0.44	13.72	0.0206
								regulation of cellular process	3481	115	44.79	2.57	4.98e-25
								regulation of biological process	3770	116	48.51	2.39	1.68e-22
								regulation of transport	248	17	3.19	5.33	0.000101
								regulation of localization	398	25	5.12	4.88	2.72e-07
								regulation of secretion by cell	86	10	1.11	9.04	0.000752
								regulation of secretion	90	10	1.16	8.64	0.00113
							Cluster 4	axon midline choice point recognition	25	6	0.32	18.65	0.00359
								axon choice point recognition	27	6	0.35	17.27	0.00557
								neuron development	576	27	7.41	3.64	2.46e-05
								cell development	1331	46	17.12	2.69	1.26e-06
								cell differentiation	1683	54	21.65	2.49	3.43e-07
								cellular developmental process	1724	55	22.18	2.48	2.65e-07
								developmental process	2767	76	35.6	2.13	1.59e-08
								anatomical structure development	2676	75	34.43	2.18	8.81e-09
								neuron differentiation	679	30	8.74	3.43	1.24e-05
								generation of neurons	843	35	10.85	3.23	2.53e-06
								neurogenesis	885	35	11.39	3.07	8.9e-06
								nervous system development	1058	45	13.61	3.31	2.17e-09
								system development	1686	56	21.69	2.58	3.4e-08
								multicellular organism development	2311	70	29.73	2.35	1.89e-09
								multicellular organismal process	3591	96	46.2	2.08	6.56e-12
								axon guidance	256	15	3.29	4.55	0.00472
								axonogenesis	311	17	4	4.25	0.00235
								axon development	322	17	4.14	4.1	0.00376
								neuron projection development	439	21	5.65	3.72	0.00096
								plasma membrane bounded cell projection organization	605	22	7.78	2.83	0.0412
								cellular component organization	2565	65	33	1.97	4.1e-05
								cellular component organization or biogenesis	2694	65	34.66	1.88	0.000282
								neuron projection morphogenesis	416	20	5.35	3.74	0.00174
								plasma membrane bounded cell projection morphogenesis	417	20	5.37	3.73	0.00181
								cell projection morphogenesis	418	20	5.38	3.72	0.00187
								cell morphogenesis	522	23	6.72	3.42	0.00105
								cellular component morphogenesis	646	23	8.31	2.77	0.036
								anatomical structure morphogenesis	1494	44	19.22	2.29	0.000393
								cell part morphogenesis	427	20	5.49	3.64	0.0026
								cell morphogenesis involved in neuron differentiation	406	21	5.22	4.02	0.000268
								cell morphogenesis involved in differentiation	453	22	5.83	3.77	0.000378
								neuron projection guidance	265	15	3.41	4.4	0.00717
								movement of cell or subcellular component	705	25	9.07	2.76	0.0154
								chemotaxis	277	15	3.56	4.21	0.0122
								taxis	338	21	4.35	4.83	1.2e-05
								response to external stimulus	888	39	11.43	3.41	4.16e-08
								response to stimulus	2637	71	33.93	2.09	3.36e-07
								locomotion	627	27	8.07	3.35	0.00014
								response to chemical	1101	38	14.17	2.68	6.46e-05
							Cluster 5	regulation of neurotransmitter secretion	23	5	0.3	16.9	0.0466
								modulation of chemical synaptic transmission	110	13	1.42	9.19	9.16e-06
								regulation of trans-synaptic signaling	110	13	1.42	9.19	9.16e-06
								regulation of signaling	863	35	11.1	3.15	4.66e-06
								regulation of cell communication	857	35	11.03	3.17	3.89e-06
								regulation of cellular localization	122	11	1.57	7.01	0.00224
								regulation of neurotransmitter transport	23	5	0.3	16.9	0.0466
							Cluster 6	regulation of membrane potential	89	12	1.15	10.48	8.97e-06
							Cluster 7	locomotor rhythm	64	8	0.82	9.72	0.00737
								locomotory behavior	179	16	2.3	6.95	6.84e-06
								behavior	563	38	7.24	5.25	1.47e-13
								circadian behavior	72	8	0.93	8.64	0.0173
								rhythmic behavior	74	8	0.95	8.4	0.0211
								rhythmic process	120	11	1.54	7.12	0.00191
								circadian rhythm	119	11	1.53	7.18	0.00176
							Cluster 8	synapse assembly	67	8	0.86	9.28	0.0103
								synapse organization	175	12	2.25	5.33	0.0116
							Cluster 9	negative regulation of translation	73	8	0.94	8.52	0.0192
								negative regulation of cellular macromolecule biosynthetic process	402	21	5.17	4.06	0.000227
								negative regulation of cellular biosynthetic process	414	21	5.33	3.94	0.000369
								negative regulation of cellular metabolic process	605	24	7.78	3.08	0.00363
								negative regulation of metabolic process	718	25	9.24	2.71	0.021
								negative regulation of biological process	1343	47	17.28	2.72	5.01e-07
								regulation of metabolic process	2061	67	26.52	2.53	2.85e-10
								negative regulation of cellular process	1165	46	14.99	3.07	1.48e-08
								regulation of cellular metabolic process	1897	64	24.41	2.62	2.52e-10
								regulation of cellular biosynthetic process	1361	48	17.51	2.74	2.29e-07
								regulation of biosynthetic process	1364	48	17.55	2.74	2.47e-07
								negative regulation of biosynthetic process	414	21	5.33	3.94	0.000369
								regulation of cellular macromolecule biosynthetic process	1310	46	16.85	2.73	7.49e-07
								regulation of macromolecule biosynthetic process	1316	46	16.93	2.72	8.69e-07
								regulation of macromolecule metabolic process	1925	65	24.77	2.62	1.39e-10
								negative regulation of macromolecule biosynthetic process	402	21	5.17	4.06	0.000227
								negative regulation of macromolecule metabolic process	673	25	8.66	2.89	0.00684
								negative regulation of gene expression	519	22	6.68	3.29	0.00365
								regulation of gene expression	1503	52	19.34	2.69	5.6e-08
								negative regulation of cellular amide metabolic process	78	8	1	7.97	0.0308
								regulation of cellular amide metabolic process	205	13	2.64	4.93	0.0105
								regulation of nitrogen compound metabolic process	1830	64	23.55	2.72	4.71e-11
								negative regulation of nitrogen compound metabolic process	566	24	7.28	3.3	0.00113
								regulation of translation	159	11	2.05	5.38	0.0274
								regulation of cellular protein metabolic process	610	25	7.85	3.19	0.00117
								regulation of protein metabolic process	649	25	8.35	2.99	0.00359
								regulation of primary metabolic process	1848	63	23.78	2.65	2.72e-10
							Cluster 10	courtship behavior	118	10	1.52	6.59	0.0125
								mating behavior	165	13	2.12	6.12	0.00097
								mating	179	13	2.3	5.64	0.00239
								sexual reproduction	1116	38	14.36	2.65	9.22e-05
								reproduction	1448	39	18.63	2.09	0.0218
								multi-organism reproductive process	1116	38	14.36	2.65	9.22e-05
								multi-organism process	1415	44	18.21	2.42	8.19e-05
								reproductive process	1231	39	15.84	2.46	0.00039
								reproductive behavior	175	13	2.25	5.77	0.00187
								multicellular organismal reproductive process	1108	38	14.26	2.67	7.64e-05
								multicellular organism reproduction	1327	38	17.07	2.23	0.00705
							Cluster 11	adult behavior	157	13	2.02	6.44	0.000555
							Cluster 12	learning or memory	162	13	2.08	6.24	0.00079
								cognition	162	13	2.08	6.24	0.00079
								nervous system process	652	27	8.39	3.22	0.000305
								system process	724	27	9.32	2.9	0.00236
							Cluster 13	response to light stimulus	146	11	1.88	5.86	0.0124
								response to abiotic stimulus	438	23	5.64	4.08	4.65e-05
							Cluster 14	regulation of response to external stimulus	133	10	1.71	5.84	0.0351
								regulation of response to stimulus	964	33	12.4	2.66	0.000805
							Cluster 15	cell maturation	170	12	2.19	5.49	0.00864
								developmental maturation	208	13	2.68	4.86	0.0122
							Cluster 16	positive regulation of multicellular organismal process	217	14	2.79	5.01	0.00355
								regulation of multicellular organismal process	712	32	9.16	3.49	2.27e-06
								positive regulation of biological process	1413	55	18.18	3.03	9.7e-11
							Cluster 17	regulation of developmental growth	214	13	2.75	4.72	0.0166
								regulation of growth	297	15	3.82	3.93	0.0278
								regulation of developmental process	700	29	9.01	3.22	9.46e-05
							Cluster 18	establishment or maintenance of cell polarity	217	13	2.79	4.66	0.0192
							Cluster 19	positive regulation of cellular protein metabolic process	289	15	3.72	4.03	0.0202
								positive regulation of cellular metabolic process	745	34	9.59	3.55	4.06e-07
								positive regulation of cellular process	1259	49	16.2	3.02	3.99e-09
								positive regulation of metabolic process	791	35	10.18	3.44	4.72e-07
								positive regulation of protein metabolic process	304	15	3.91	3.84	0.0365
								positive regulation of nitrogen compound metabolic process	720	33	9.26	3.56	7.16e-07
								positive regulation of macromolecule metabolic process	731	32	9.41	3.4	4.31e-06
							Cluster 20	regulation of nervous system development	321	16	4.13	3.87	0.0162
								regulation of multicellular organismal development	520	24	6.69	3.59	0.000244
							Cluster 21	cell fate commitment	329	16	4.23	3.78	0.022
							Cluster 22	positive regulation of cellular biosynthetic process	478	23	6.15	3.74	0.000224
								positive regulation of biosynthetic process	478	23	6.15	3.74	0.000224
							Cluster 23	negative regulation of RNA metabolic process	343	16	4.41	3.63	0.0367
								regulation of nucleobase-containing compound metabolic process	1308	44	16.83	2.61	7.8e-06
								regulation of RNA metabolic process	1251	43	16.1	2.67	6.56e-06
							Cluster 24	positive regulation of macromolecule biosynthetic process	442	20	5.69	3.52	0.00439
							Cluster 25	positive regulation of gene expression	465	21	5.98	3.51	0.00241
							Cluster 26	embryo development	515	21	6.63	3.17	0.0119
							Cluster 27	pattern specification process	498	20	6.41	3.12	0.0257
							Cluster 28	regulation of cellular component organization	772	31	9.93	3.12	5.96e-05
							Cluster 29	signal transduction	1063	35	13.68	2.56	0.000816
								cellular response to stimulus	1549	45	19.93	2.26	0.0004
							Cluster 30	regulation of transcription, DNA-templated	1148	37	14.77	2.51	0.000583
								regulation of nucleic acid-templated transcription	1148	37	14.77	2.51	0.000583
								regulation of RNA biosynthetic process	1148	37	14.77	2.51	0.000583
							Cluster 31	animal organ development	1175	36	15.12	2.38	0.00295
